# Supplementary material
Source: PubMed Central journal article supplement (PMC7081406)
Supplement: ao9b04171_si_002.pdf [file ao9b04171_si_002.pdf]

## Supporting Information

### **Inhibition of the *Yersinia pestis* Methylerythritol Phosphate Pathway of Isoprenoid Biosynthesis by $\alpha$ -Phenyl Substituted Reverse Fosmidomycin Analogs**

Haley S. Ball<sup>1,3\*</sup>, Misgina Girma<sup>1</sup>, Mosufa Zainab<sup>1</sup>, Honoria Riley<sup>1</sup>, Christoph T. Behrendt<sup>2</sup>, Claudia Lienau<sup>2</sup>, Sarah Konzuch<sup>2</sup>, Leandro A.A. Avelar<sup>2</sup>, Beate Lungerich<sup>2</sup>, Iswarduth Soojhawon<sup>3</sup>, Schroeder M. Noble<sup>3</sup>, Thomas Kurz<sup>2</sup>, Robin D. Couch<sup>1</sup>

<sup>1</sup>Department of Chemistry and Biochemistry, George Mason University, Manassas, Virginia, 20110, United States of America

<sup>2</sup>Institute of Pharmaceutical and Medicinal Chemistry, Heinrich Heine University Düsseldorf, Universitätsstr. 1, 40225, Düsseldorf, Germany

<sup>3</sup>Wound Infections Department, Bacterial Diseases Branch, Walter Reed Army Institute of Research, Silver Spring, Maryland, 20910, United States of America

\*Corresponding Author

## Half-maximal inhibition ( $IC_{50}$ ) determination

Data was collected at 340 nm using an Agilent 8453 UV-Visible Spectrophotometer equipped with a temperature regulated cuvette holder. Half-maximal inhibition ( $IC_{50}$ ) of enzyme activity was determined using nonlinear regression of a plot of fractional enzyme activity as a function of inhibitor concentration (sigmoidal dose-response curve) using GraphPad Prism 5.0.

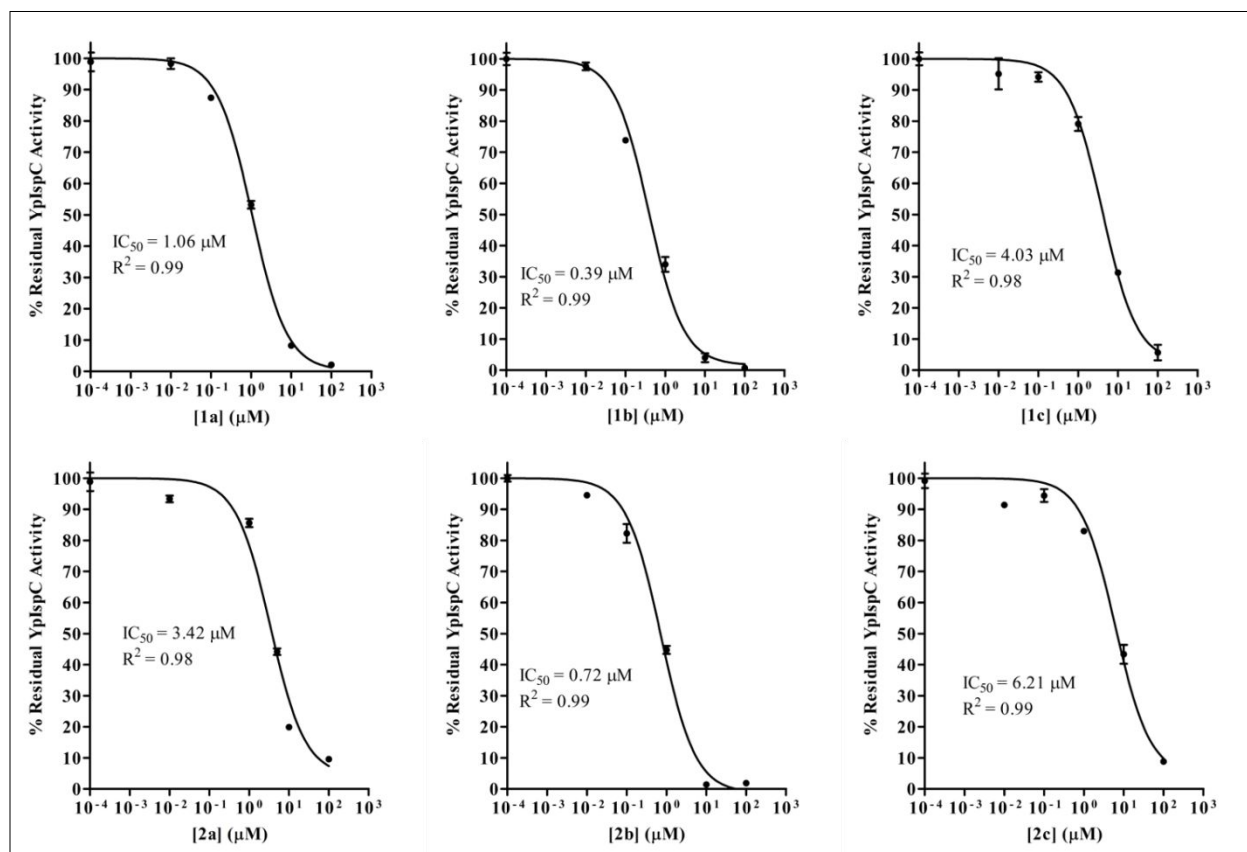

**Figure S1.**  $IC_{50}$  plots indicating dose-dependent inhibition of YpIspC by 1a-2c. The  $R^2$  value for each plot is indicated.  $IC_{50}$  values were obtained using GraphPad Prism 5.0. Assays were performed in duplicate. The error bars indicate the standard deviation for each data point.

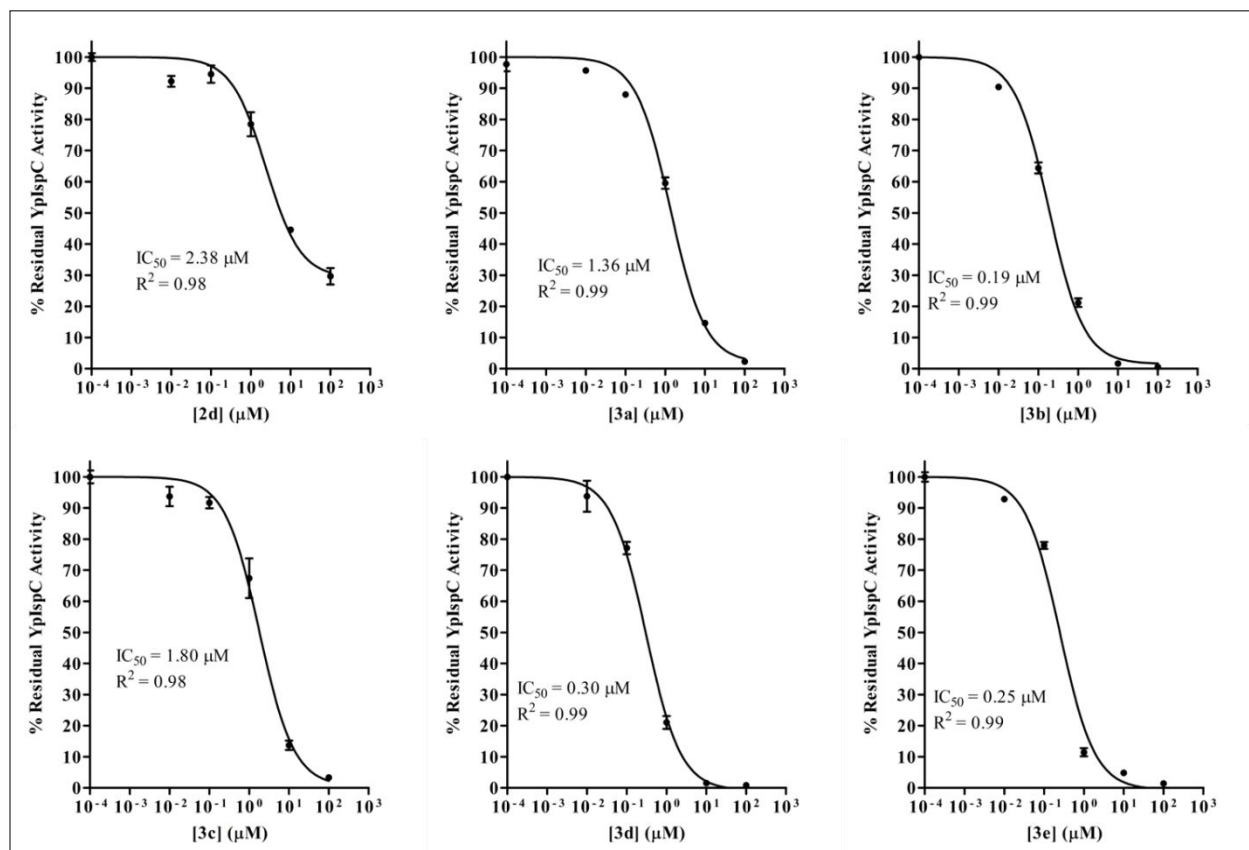

**Figure S2. IC<sub>50</sub> plots indicating dose-dependent inhibition of YpIspC by 2d-3c.** The R<sup>2</sup> value for each plot is indicated. IC<sub>50</sub> values were obtained using GraphPad Prism 5.0. Assays were performed in duplicate. The error bars indicate the standard deviation for each data point.

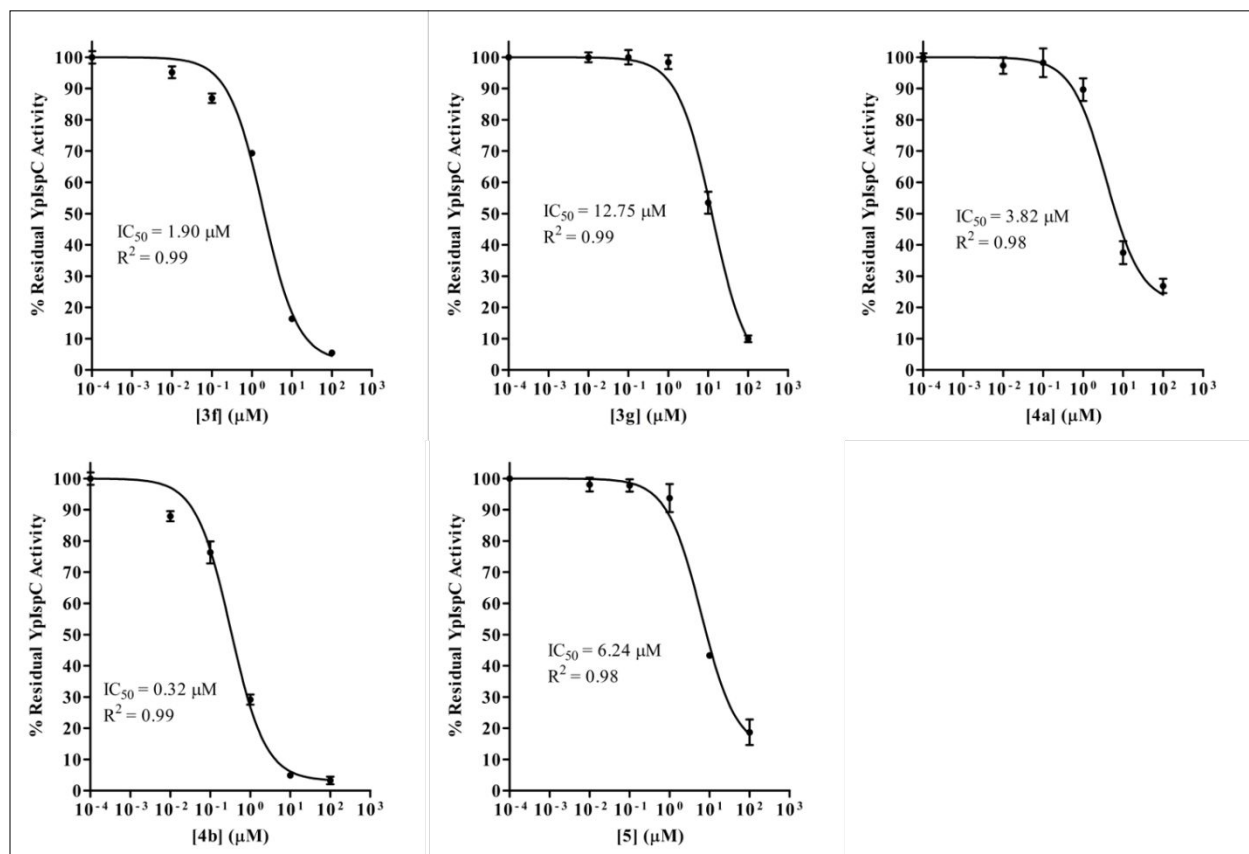

**Figure S3. IC<sub>50</sub> plots indicating dose-dependent inhibition of YpIspC by 3f-5.** The R<sup>2</sup> value for each plot is indicated. IC<sub>50</sub> values were obtained using GraphPad Prism 5.0. Assays were performed in duplicate. The error bars indicate the standard deviation for each data point.

## Compound characterization

Melting points (M.p.) were taken in open capillaries on a Stuart melting point apparatus SMP11 and are uncorrected. Proton ( $^1\text{H}$ ), carbon ( $^{13}\text{C}$ ) and phosphorus ( $^{31}\text{P}$ ) NMR spectra were recorded on a Bruker Avance 300, 500 and 600MHz using  $\text{CDCl}_3$  and  $\text{DMSO-d}_6$  as solvent. Chemical shifts are given in parts per million (ppm), ( $\delta$  relative to residual solvent peak for  $^1\text{H}$  and  $^{13}\text{C}$ ). High-resolution mass spectrometry (HRMS) analysis was performed using a UHR-TOF maXis 4G instrument (Bruker Daltonics, Bremen, Germany). The purity of compounds was determined by Elemental analysis using a Perkin-Elmer PE 2400 CHN elemental analyzer or by high-performance liquid chromatography (HPLC). Instrument: Elite LaChrom system [Hitachi L-2130 (pump) and L-2400 (UV-detector)]; column: Phenomenex Luna C-18(2) 5  $\mu\text{m}$  particle size (250 mm  $\times$  4.6 mm), supported by Phenomenex Security Guard Cartridge Kit C18 (4.0 mm  $\times$  3.0 mm).

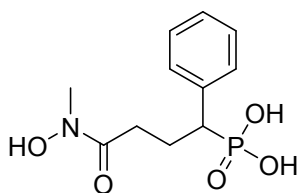

**1a**

Chemical Formula:  $\text{C}_{11}\text{H}_{16}\text{NO}_5\text{P}$

**Figure S4. [3-[Hydroxy(methyl)amino]-3-oxo-1-phenyl-propyl] phosphonic acid (1a).**<sup>1</sup> Yellow oil (238 mg, 92%);  $^1\text{H}$  NMR (500 MHz,  $\text{DMSO-d}_6$ ):  $\delta$ =7.54-6.68 (m, 5H), 3.40 (ddd,  $J$  = 21.7, 11.0, 2.6 Hz, 1H), 3.22-3.08 (m, 3H), 2.98 (s, 1H), 2.94-2.82 (m, 1H) ppm;  $^{13}\text{C}$  NMR (125 MHz,  $\text{DMSO-d}_6$ ):  $\delta$ =170.6 (d,  $^3J_{\text{C-P}}$ =17.7 Hz), 138.4 (d,  $^2J_{\text{C-P}}$  = 6.7 Hz), 128.9 (d,  $^3J_{\text{C-P}}$  = 6.0 Hz), 127.6, 125.9 (d,  $^4J_{\text{C-P}}$  = 1.7 Hz),

40.5 (d,  $^1J_{C-P} = 131.4$  Hz), 35.7, 32.5 ppm. Anal. calcd. for  $C_{10}H_{14}NO_5P$ : C 46.34, H 5.44, N 5.40, found: C 46.18, H 6.23, N 4.64. HPLC analysis: retention time = 1.880 min; peak area: 97.83%. Eluent A: 5 mM  $NH_4OAc$  solution; eluent B:  $CH_3CN$ , isocratic (50:50) over 20 min at a flow rate of 1 mL/min.

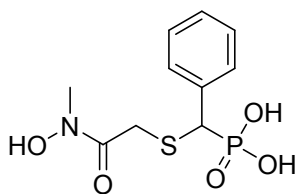

**1b**

Chemical Formula:  $C_{10}H_{14}NO_5PS$

**Figure S5. (((2-(Hydroxy(methyl)amino)-2-oxoethyl) thio) (phenyl)methyl) phosphonic acid**

**(1b).**<sup>2</sup> White solid; yield 38% (0.111 g, 0.38 mmol). M.p. 112 °C;  $^1H$  NMR (500.13 MHz,  $DMSO-d_6$ ):  $\delta$ =9.99 (br. s, OH), 7.47–7.35 (m, 2H), 7.34–7.26 (m, 2H), 7.26–7.18 (m, 1H), 4.25 (d,  $^2J(H,P)$ =19.0 Hz, 1H, PCH), 3.50 (d,  $^2J(H,H)$ =14.6 Hz, 1H, SCH<sub>2</sub>), 3.23 (d,  $^2J(H,H)$ =14.6 Hz, 1H, SCH<sub>2</sub>), 3.06 (s, 3H, NCH<sub>3</sub>);  $^{13}C$  NMR (125.76 MHz,  $DMSO-d_6$ ):  $\delta$ =168.93 (C=O), 137.36 (d,  $^2J(C,P)$ =3.8 Hz), 129.23 (d,  $^3J(C,P)$ =5.8 Hz), 127.86, 126.78, 45.72 (d,  $^1J(C,P)$ =139.2 Hz, PC), 35.71 (NCH<sub>3</sub>), 31.85 (d,  $^3J(C,P)$ =6.2 Hz, SCH<sub>2</sub>). HRMS (ESI): m/z calculated for  $C_{10}H_{14}NO_5PS+H^+$  [M+H<sup>+</sup>]: 292.04031; found: 292.03987; HPLC analysis: retention time=1.870 min, peak area: 99.08%, eluent A:  $NH_4OAc$  solution (5mM), eluent B:  $CH_3CN$ , isocratic (1:1) over 20 min with a flow rate of 1 mL min<sup>-1</sup>.

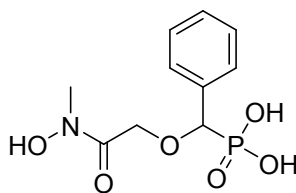

**1c**

Chemical Formula:  $C_{10}H_{14}NO_6P$

**Figure S6. ((2-(hydroxy(methyl)amino)-2-oxoethoxy) (phenyl)methyl) phosphonic acid**

**(1c).**<sup>3</sup> White crystals (330 mg, 85%); M.p. 169 °C. <sup>1</sup>H-NMR(500 MHz, DMSO-d<sub>6</sub>) = δ (ppm) 3.07 (s, 3H, NCH<sub>3</sub>), 4.20 (d, *J*=16.1 Hz, 1H, OCH<sub>2</sub>C=O), 4.34 (d, *J*=16.1 Hz, 1H, OCH<sub>2</sub>C=O), 4.68 (d, <sup>2</sup>*J*<sub>H,P</sub>=14.4 Hz, 1H, PCH), 7.25–7.40 (m, 5H, arom.), 9.86 (s, 1H, OH). <sup>13</sup>C-NMR (200 MHz, DMSO-d<sub>6</sub>) = δ (ppm) 35.63 (NCH<sub>3</sub>) 66.75 (d, <sup>3</sup>*J*<sub>C,P</sub> = 10.8 Hz, OCH<sub>2</sub>C=O), 78.65 (d, <sup>1</sup>*J*<sub>C,P</sub> = 159.0 Hz, PCH), 127.35, 127.68 (2C), 127.97 (d, *J*<sub>C,P</sub> = 5.4 Hz, 2C), 136.17, 169.49 (C=O); Anal. calcd. for C<sub>10</sub>H<sub>14</sub>NO<sub>6</sub>P: C 43.65, H 5.13, N 5.09, found: C 43.40, H 5.05, N 4.91.

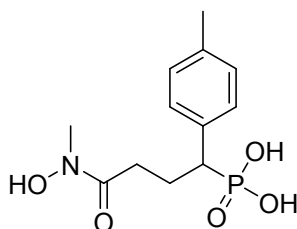

**2a**

Chemical Formula: C<sub>12</sub>H<sub>18</sub>NO<sub>5</sub>P

**Figure S7. (4-(hydroxy(methyl)amino)-4-oxo-1-(p-tolyl) butyl) phosphonic acid (2a).**<sup>4</sup>

Colorless oil (430 mg, 93%), <sup>1</sup>H-NMR: (500 MHz, DMSO-d<sub>6</sub>), (ppm): 1.86-2.00 (m, 1H, CHCH<sub>2</sub>), 2.11- 2.23 (m, 3H, CH<sub>2</sub>), 2.26 (s, 3H, PhCH<sub>3</sub>), 2.73-2.89 (m, 1H, PCH), 3.02 (s, 3H, NCH<sub>3</sub>), 6.95-7.10 (m, 2H), 7.18 (dd, *J* = 8.01, 1.76 Hz, 2H, arom.), 10.16 (OH). <sup>13</sup>C-NMR: (125 MHz, DMSO-d<sub>6</sub>), (ppm): 20.51 (PhCH<sub>3</sub>), 25.14 (CH<sub>2</sub>CH<sub>2</sub>), 29.98 (d, <sup>2</sup>*J*<sub>C-P</sub> = 15.25 Hz, CHCH<sub>2</sub>), 35.54 (NCH<sub>3</sub>), 44.26 (d, <sup>1</sup>*J*<sub>C-P</sub> = 133.13 Hz, PCH), 128.43, 128.86 (d, <sup>3</sup>*J*<sub>C-P</sub> = 6 Hz), 134.85 (d, <sup>5</sup>*J*<sub>C-P</sub> = 2.86 Hz), 135.34 (d, <sup>2</sup>*J*<sub>C-P</sub> = 6.24 Hz, arom.), 172.54 (C=O) <sup>31</sup>P-NMR: (202,5 MHz, DMSO-d<sub>6</sub>), (ppm): 25,07. HPLC analysis: retention time=1.887 min, peak area: 99.6%, eluent A: NH<sub>4</sub>OAc solution (5mM), eluent B: CH<sub>3</sub>CN, isocratic (1:1) over 20 min with a flow rate of 1 mL min<sup>-1</sup>.

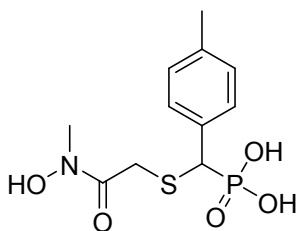

**2b**

Chemical Formula: C<sub>11</sub>H<sub>16</sub>NO<sub>5</sub>PS

**Figure S8. ((3,4-Difluorophenyl) ((2-(hydroxy(methyl)amino)-2-oxoethyl) thio) methyl)**

**phosphonic acid (2b).**<sup>5</sup> White solid; yield 45% (0.15 g, 0.46 mmol). M.p. 137 °C; <sup>1</sup>H NMR (500.13 MHz, DMSO-d<sub>6</sub>): δ=10.04 (br. s, OH), 7.51-7.31 (m, 2H), 7.28–7.14 (m, 1H), 4.28 (d, <sup>2</sup>J(H,P)=19.6 Hz, 0.83H, PCH), 4.21 (d, <sup>2</sup>J(H,P)=19.2 Hz, 0.17H, PCH), 3.46 (d, <sup>2</sup>J(H,H)=14.6 Hz, 1H, SCH<sub>2</sub>), 3.23 (d, <sup>2</sup>J(H,H)=14.6 Hz, 1H, SCH<sub>2</sub>), 3.09 (s, 0.21H, NCH<sub>3</sub>), 3.05 (s, 2.54H, NCH<sub>3</sub>), 3.01 ppm (s, 0.25H, NCH<sub>3</sub>); <sup>13</sup>C NMR (125.76 MHz, DMSO-d<sub>6</sub>): δ=168.66 (C=O), 148.79 (dd, <sup>1</sup>J(C,F)=244.7 Hz, <sup>2</sup>J(C,F)=11.7 Hz), 148.34 (dd, <sup>1</sup>J(C,F)=244.8 Hz, <sup>2</sup>J(C,F)=12.5 Hz), 135.58, 126.12 (m), 117.80 (dd, <sup>2</sup>J(C,F)=17.7 Hz, <sup>3</sup>J(C,F)=<sup>3</sup>J(C,P)=5.6 Hz), 116.77 (d, <sup>2</sup>J(C,F)=17.0 Hz), 45.01 (d, <sup>1</sup>J(C,P)=137.8 Hz, PC), 35.70 (NCH<sub>3</sub>), 31.88 ppm (d, <sup>3</sup>J(C,P)=7.4 Hz, SCH<sub>2</sub>); Elemental analysis calculated (%) for C<sub>10</sub>H<sub>12</sub>F<sub>2</sub>NO<sub>5</sub>PS: C 36.70, H 3.70, N 4.28, found: C 36.97, H 4.00, N 3.92.

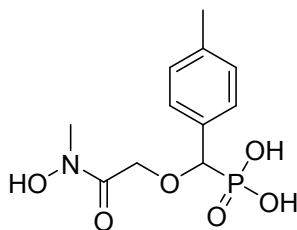

**2c**

Chemical Formula: C<sub>11</sub>H<sub>16</sub>NO<sub>6</sub>P



**Figure S9. ((2-(hydroxy(methyl)amino)-2-oxoethoxy) (p-tolyl) methyl) phosphonic acid**

**(2c).**<sup>3</sup> White crystals (410mg, 65%). M. p. 164 °C. <sup>1</sup>H-NMR(500 MHz, DMSO-d<sub>6</sub>) = δ (ppm) 2.29 (s, 1H, CH<sub>3</sub>), 3.06 (s, 3H, NCH<sub>3</sub>), 4.16 (d, *J*=16.1 Hz, 1H, OCH<sub>2</sub>C=O), 4.30 (d, *J*=16.1 Hz, 1H, OCH<sub>2</sub>C=O), 4.62 (d, <sup>2</sup>*J*<sub>H,P</sub>=14.3 Hz, 1H, PCH), 7.14 (d, *J*=7.8, 2H, arom.), 7.26 (d, *J*=7.9 Hz, 2H, arom.), 9.84 (s, 1H, OH) <sup>13</sup>C-NMR(125 MHz, DMSO-d<sub>6</sub>) = δ (ppm) 20.64 (CH<sub>3</sub>), 35.63 (NCH<sub>3</sub>), 66.55 (d, <sup>3</sup>*J*<sub>C,P</sub>=11.1), 78.47 (d, <sup>1</sup>*J*<sub>C,P</sub>=160.0 Hz, PCH), 128.02 (d, <sup>3</sup>*J*<sub>C,P</sub>=5.4 Hz, 2C), 128.19 (2C), 133.03, 136.59 (d, <sup>5</sup>*J*<sub>P,C</sub>=1.3 Hz), 169.53 (C=O). Anal. calcd. for C<sub>11</sub>H<sub>16</sub>NO<sub>6</sub>P: C 45.68, H 5.58, N 4.84, found: C 45.46, H 5.72, N 4.93.

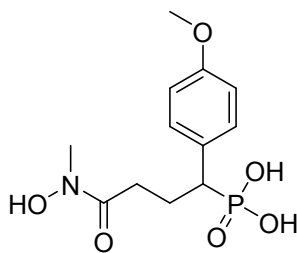

**2a**

Chemical Formula: C<sub>12</sub>H<sub>18</sub>NO<sub>6</sub>P

**Figure S10. 4-(Hydroxyamino)-1-(4-methoxyphenyl)-4-oxobutylphosphonic acid (2d).**<sup>4</sup>

White solid (246 mg, 85 %), Mp: 168 °C; <sup>1</sup>H NMR (600.22 MHz, DMSO-d<sub>6</sub>): δ = 1.77-1.80 (m, 2H, CH<sub>2</sub>CH<sub>2</sub>), 1.86-1.92 (m, 1H, CHCH<sub>2</sub>), 2.19-2.25 (m, 1H, CHCH<sub>2</sub>), 2.74 (ddd, *J* = 21.7, 11.1, 3.5 Hz, 1H, PCH), 3.72 (s, 3H, OCH<sub>3</sub>), 6.85 (d, *J* = 8.5 Hz), 7.15 (d, *J* = 7.1 Hz), 10.28 (s, 1H) ppm; <sup>13</sup>C NMR (150.93 MHz, DMSO-d<sub>6</sub>): δ = 26.3 (CH<sub>2</sub>CH<sub>2</sub>), 30.6 (d, <sup>2</sup>*J*<sub>C-P</sub> = 14.9 Hz, CHCH<sub>2</sub>), 43.9 (d, <sup>1</sup>*J*<sub>C-P</sub> = 134.8 Hz, PCH), 54.9 (OCH<sub>3</sub>), 113.4, 129.9 (d, <sup>3</sup>*J*<sub>C-P</sub> = 5.8 Hz), 157.6, 168.8 (C=O) ppm; HPLC analysis: retention time = 1,87 min; peak area: 95.8%. Eluent A, 5 mM NH<sub>4</sub>OAc solution; eluent B, CH<sub>3</sub>CN/isocratic (1:1) over 20 min at a flow rate of 1 mL min<sup>-1</sup>.

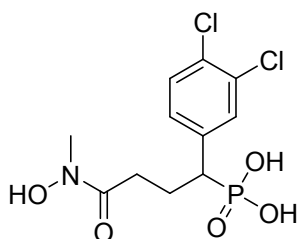

**3a**

Chemical Formula: C<sub>11</sub>H<sub>14</sub>Cl<sub>2</sub>NO<sub>5</sub>P

**Figure S11. (1-(3,4-Dichlorophenyl)-4-[hydroxy(methyl)amino]-4-oxo-butyl) phosphonic acid (3a).**<sup>2</sup> Orange oil (430mg, 93%). <sup>1</sup>H-NMR: (500 MHz, DMSO-d<sub>6</sub>), (ppm): 1.83-2.00 (m, 1H, CHCH<sub>2</sub>), 2.08-2.34 (m, 3H, CH<sub>2</sub>), 2.92-3.01 (m, 1H, PCH), 3.03 (s, 3H, NCH<sub>3</sub>), 7.15-7.39 (m, 1H), 7.49 (t, *J* = 1.9 Hz, 1H), 7.57 (d, *J* = 8.3 Hz, 1H, aromat.), 9.68 (s, 1H) <sup>13</sup>C-NMR: (125 MHz, DMSO-d<sub>6</sub>), (ppm): 25.34 (CH<sub>2</sub>CH<sub>2</sub>), 30.02 (d, <sup>2</sup>*J*C-P = 14.6 Hz, CHCH<sub>2</sub>), 36.01 (NCH<sub>3</sub>), 44.12 (d, <sup>1</sup>*J*C-P = 132.6 Hz, PCH), 129.19 (d, <sup>4</sup>*J*C-P = 3.6 Hz), 129.92 (d, <sup>3</sup>*J*C-P = 6.2 Hz), 130.50, 130.90 (d, <sup>4</sup>*J*C-P = 2.5 Hz), 131.21 (d, <sup>3</sup>*J*C-P = 6 Hz), 140.25 (d, <sup>2</sup>*J*C-P = 6.4 Hz, aromat.), 172.66 (C=O) <sup>31</sup>P-NMR: (202,5 MHz, DMSO-*d*6), (ppm): 23,13 HPLC analysis: retention time = 1,967 min; peak area: 99.0%. Eluent A, 5 mM NH<sub>4</sub>OAc solution; eluent B, CH<sub>3</sub>CN/isocratic (1:1) over 20 min at a flow rate of 1 mL min<sup>-1</sup>.

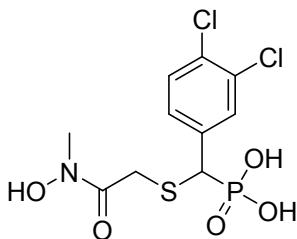

**3b**

Chemical Formula: C<sub>10</sub>H<sub>12</sub>Cl<sub>2</sub>NO<sub>5</sub>PS

**Figure S12. (((2-(Hydroxy(methyl)amino)-2-oxoethyl) thio)(naphthalen-1-yl)methyl)phosphonic acid (3b).**<sup>6</sup> White solid; yield 55% (0.188 g, 0.55 mmol). M.p. 137 °C;

<sup>1</sup>H NMR (500.13 MHz, [D<sub>6</sub>]DMSO): δ=9.99 (br. s, OH), 8.20 (d, *J*=6.9 Hz, 1H), 7.92 (d, *J*=7.9 Hz, 1H), 7.88 (s, 1H), 7.83 (d, *J*=8.1 Hz, 1H), 7.59–7.44 (m, 3H), 5.19 (d, <sup>2</sup>*J*(H,P)=18.3 Hz, 1H, PCH), 3.74 (d, <sup>2</sup>*J*(H,H)=14.2 Hz, 1H, SCH<sub>2</sub>), 3.34 (d, <sup>2</sup>*J*(H,H)=14.5 Hz, 1H, SCH<sub>2</sub>), 3.05 ppm (s, 3H, NCH<sub>3</sub>); <sup>13</sup>C NMR (125.76 MHz DMSO-d<sub>6</sub>): δ=169.11 (C=O), 133.55 (m), 133.26 (m), 131.28 (m), 128.46, 127.36, 126.95 (m), 126.00 (m), 125.47, 125.22, 123.61, 38.61 (m, PC), 35.72 (NCH<sub>3</sub>), 32.34 ppm (m, SCH<sub>2</sub>); HRMS (ESI): *m/z* calculated for C<sub>14</sub>H<sub>16</sub>NO<sub>5</sub>PS+H<sup>+</sup> [M+H<sup>+</sup>]: 342.05596; found: 342.05537; HPLC analysis: retention time=1.860 min, peak area: 99.39%, eluent A: NH<sub>4</sub>OAc solution (5mM), eluent B: CH<sub>3</sub>CN, isocratic (1:1) over 20 min with a flow rate of 1 mL min<sup>-1</sup> and detection at 254 nm; column temperature: RT.

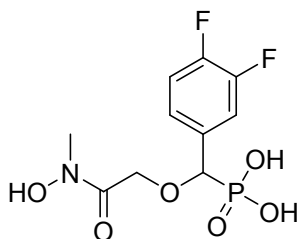

**3c**

Chemical Formula: C<sub>10</sub>H<sub>12</sub>F<sub>2</sub>NO<sub>6</sub>P

**Figure S13. ((3,4-Dichlorophenyl) (2-(hydroxy(methyl)amino)-2-oxoethoxy) methyl) phosphonic acid (3c).**<sup>3</sup> Colorless crystals (400 mg, 21%). M. p. 154 °C. <sup>1</sup>H-NMR(500 MHz, DMSO-d<sub>6</sub>) = δ (ppm) 3.07 (s, 3H, NCH<sub>3</sub>), 4.20 (d, *J*=16.0 Hz, 1H, OCH<sub>2</sub>C=O), 4.37 (d, *J*=16.2 Hz, 1H, OCH<sub>2</sub>C=O), 4.74 (d, <sup>2</sup>*J*<sub>H,P</sub>=14.2 Hz, 1H, PCH), 7.36 (dt, *J*=8.2, 1.7 Hz, 1H, arom.), 7.59 (t, *J*=1.9 Hz, 1H, arom.), 7.62 (d, *J*=8.3 Hz, 1H, arom.), 9.87 (br. s, 1H, OH). <sup>13</sup>C-NMR(125 MHz, DMSO-d<sub>6</sub>) = δ (ppm) 35.63 (NCH<sub>3</sub>), 67.30 (d, <sup>3</sup>*J*<sub>C,P</sub>=9.3 Hz, OCH<sub>2</sub>C=O), 77.45 (d, <sup>1</sup>*J*<sub>C,P</sub>=157.4 Hz, PCH), 128.10 (d, <sup>3</sup>*J*<sub>C,P</sub>=5.1 Hz, C<sub>6</sub>H<sub>3</sub>Cl<sub>2</sub>: C6), 129.48 (d, <sup>3</sup>*J*<sub>C,P</sub>=5.1 Hz, C<sub>6</sub>H<sub>3</sub>Cl<sub>2</sub>: C2), 129.85 (m, 2C), 130.36 (d, *J*<sub>C,P</sub>=1.9 Hz), 138.01, 169.19 (C=O). Anal. calcd. for C<sub>11</sub>H<sub>16</sub>NO<sub>6</sub>P: C 45.68, H 5.58, N 4.84, found: C 45.46, H 5.72, N 4.93.

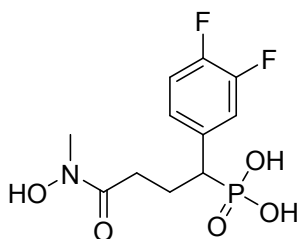

**3d**

Chemical Formula: C<sub>11</sub>H<sub>14</sub>F<sub>2</sub>NO<sub>5</sub>P

**Figure S14. (1-(3,4-Difluorophenyl)-4-[hydroxy(methyl)amino]-4-oxo-butyl) phosphonic acid (3d).**<sup>2</sup> Colorless solid (400 mg, 84%). M.p. 116 °C. <sup>1</sup>H-NMR: (500 MHz, DMSO-d<sub>6</sub>), (ppm): 1.82-1.98 (m, 1H, CHCH<sub>2</sub>), 2.20 (s, 3H, CH<sub>2</sub>), 2.97 (dd, *J* = 21.7, 9.6 Hz, 1H, PCH), 3.02 (s, 3H, NCH<sub>3</sub>), 6.86-7.18 (m, 1H), 7.22-7.30 (m, 1H), 7.35 (dd, *J* = 19.0, 8.91 Hz, 1H, aromat.), 9.67 (s, 1H, OH) <sup>13</sup>C-NMR: (125 MHz, DMSO-d<sub>6</sub>), (ppm): 25.00 (CH<sub>2</sub>CH<sub>2</sub>), 29.69 (d, <sup>2</sup>*J*C-P = 15.1 Hz, CHCH<sub>2</sub>), 35.54 (NCH<sub>3</sub>), 43.61 (d, <sup>1</sup>*J*C-P = 133.4 Hz, PCH), 116.77 (d, <sup>2</sup>*J*C-F = 16.6 Hz, <sup>3</sup>*J*C-F = 1.5 Hz), 117.54 (dd, <sup>2</sup>*J*C-F = 16.9 Hz, <sup>3</sup>*J*C-F = 5.8 Hz), 125.82, 136.13, 148.96 (dd, <sup>1</sup>*J*C-F = 250.6 Hz, <sup>2</sup>*J*C-F = 13.9 Hz), 149.76 (dd, <sup>1</sup>*J*C-F = 242.9 Hz, <sup>2</sup>*J*C-F = 10.8 Hz, aromat.), 172.20 (C=O) <sup>31</sup>P-NMR: (202,5 MHz, DMSO-*d*6), (ppm): 23,84. Anal. calcd. for C<sub>11</sub>H<sub>14</sub>NF<sub>2</sub>O<sub>5</sub>P: C 42.73, H 4.56, N 4.53, found: C 43.00, H 4.77, N 4.50.

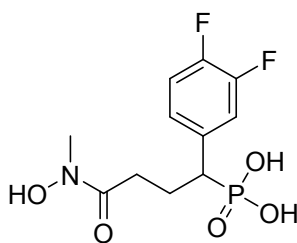

**3e**

Chemical Formula: C<sub>11</sub>H<sub>14</sub>F<sub>2</sub>NO<sub>5</sub>P

**Figure S15. ((3,4-Difluorophenyl) ((2-(hydroxy(methyl)amino)-2-oxoethyl) thio) methyl) phosphonic acid (3e):** White solid; yield 45% (0.15 g, 0.46 mmol). M.p. 137 °C; <sup>1</sup>H NMR

(500.13 MHz, DMSO- $d_6$ ):  $\delta$ =10.04 (br. s, OH), 7.51-7.31 (m, 2H), 7.28–7.14 (m, 1H), 4.28 (d,  $^2J(\text{H,P})=19.6$  Hz, 0.83H, PCH), 4.21 (d,  $^2J(\text{H,P})=19.2$  Hz, 0.17H, PCH), 3.46 (d,  $^2J(\text{H,H})=14.6$  Hz, 1H, SCH $_2$ ), 3.23 (d,  $^2J(\text{H,H})=14.6$  Hz, 1H, SCH $_2$ ), 3.09 (s, 0.21H, NCH $_3$ ), 3.05 (s, 2.54H, NCH $_3$ ), 3.01 ppm (s, 0.25H, NCH $_3$ );  $^{13}\text{C}$  NMR (125.76 MHz, DMSO- $d_6$ ):  $\delta$ =168.66 (C=O), 148.79 (dd,  $^1J(\text{C,F})=244.7$  Hz,  $^2J(\text{C,F})=11.7$  Hz), 148.34 (dd,  $^1J(\text{C,F})=244.8$  Hz,  $^2J(\text{C,F})=12.5$  Hz), 135.58, 126.12 (m), 117.80 (dd,  $^2J(\text{C,F})=17.7$  Hz,  $^3J(\text{C,F})=^3J(\text{C,P})=5.6$  Hz), 116.77 (d,  $^2J(\text{C,F})=17.0$  Hz), 45.01 (d,  $^1J(\text{C,P})=137.8$  Hz, PC), 35.70 (NCH $_3$ ), 31.88 ppm (d,  $^3J(\text{C,P})=7.4$  Hz, SCH $_2$ ); Analysis calculated (%) for C $_{10}$ H $_{12}$ F $_2$ NO $_5$ PS: C 36.70, H 3.70, N 4.28, found: C 36.97, H 4.00, N 3.92.

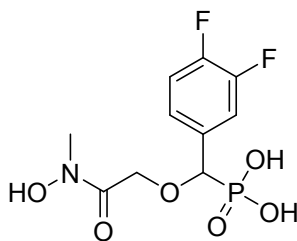

**3f**

Chemical Formula: C $_{10}$ H $_{12}$ F $_2$ NO $_6$ P

**Figure S16. (3,4-Difluorophenyl) (2-(hydroxy(methyl)amino)-2-oxoethoxy) methyl phosphonic acid (3f).**<sup>6</sup> Colorless crystal (230mg, 55%). M. p. 160°C.  $^1\text{H}$ -NMR(500 MHz, DMSO- $d_6$ ) =  $\delta$  (ppm) 3.07 (s, 3H, NCH $_3$ ), 4.26 (d,  $J=16.1$  Hz, 1H, OCH $_2$ C=O), 4.36 (d,  $J=16.1$  Hz, 1H, OCH $_2$ C=O), 4.72 (d,  $^2J_{\text{H,P}}=14.1$  Hz, 1H, PCH), 7.19–7.25 (m, 1H, C $_6$ H $_3$ F $_2$ ), 7.34–7.46 (m, 2H, C $_6$ H $_3$ F $_2$ ), 9.88 (br. s, 1H, OH)  $^{13}\text{C}$ -NMR(125 MHz, DMSO- $d_6$ ) =  $\delta$  (ppm) 35.65 (NCH $_3$ ), 67.14 (d,  $^3J_{\text{C,P}}=8.5$  Hz, OCH $_2$ C=O), 77.51 (d,  $^1J_{\text{C,P}}=158.7$  Hz, PCH), 116.63 (m, C $_6$ H $_3$ F $_2$ : C2, C5), 124.68 (m, C $_6$ H $_3$ F $_2$ : C6), 134.42 (m, C $_6$ H $_3$ F $_2$ : C1), 148.73 (ddd,  $^1J_{\text{C,F}}=244.2$  Hz,  $^2J_{\text{C,F}}=12.6$  Hz,  $^5J_{\text{C,P}}=2.6$  Hz, C $_6$ H $_3$ F $_2$ : C3), 148.89 (ddd,  $^1J_{\text{C,F}}=244.9$  Hz,  $^2J_{\text{C,F}}=12.6$  Hz,

$^4J_{C,P}=2.1$  Hz,  $C_6H_3F_2$ : C4), 169.27 (C=O) Anal. calcd. for  $C_{10}H_{12}NF_2NO_5P$ : C 38.36, H 3.89, N 4.50, found: C 38.85, H 4.08, N 4.58.

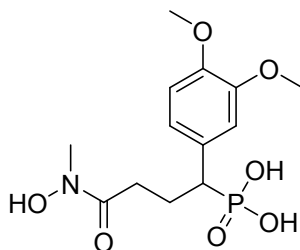

**3g**

Chemical Formula:  $C_{13}H_{20}NO_7P$

**Figure S17. 1-(3,4-Dimethoxyphenyl)-4-[(hydroxy(methyl)amino)-4-oxobutyl]phosphonic**

**acid (3g).**<sup>4</sup> White solid (290 mg, 87 %) mp: 70 °C;  $^1H$  NMR (500.13 MHz, DMSO- $d_6$ ):  $\delta$  = 1.89-1.99 (m, 1H,  $CH_2$ ), 2.19 (s, 3H,  $CH_3$ ), 2.77-2.84 (m, 1H, PCH), 3.03 (s, 3H,  $NCH_3$ ), 3.71 (s, 3H,  $OCH_3$ ), 3.72 (s, 3H,  $OCH_3$ ), 6.74-6.76 (m, 1H), 6.85-6.87 (m, 2H), 9.68 (br s, 1H, OH) ppm;  $^{13}C$  NMR (125.76 MHz, DMSO- $d_6$ ):  $\delta$  = 25.3 ( $CH_2CH_2$ ), 30.1 (d,  $^2J_{C-P}$  = 15.2 Hz,  $CHCH_2$ ), 35.6 ( $NCH_3$ ), 44.1 (d,  $^1J_{C-P}$  = 136.8 Hz, PCH), 55.3 ( $OCH_3$ ), 55.45 ( $OCH_3$ ), 111.6, 112.8 (d,  $^3J_{C-P}$  = 5.6 Hz), 121.3 (d,  $^2J_{C-P}$  = 7.2 Hz), 130.5 (d,  $^3J_{C-P}$  = 6.5 Hz), 147.3, 148.3, 172.7 (C=O) ppm; Anal. calcd. for  $C_{13}H_{20}NO_7P$ : C 46.85, H 6.05, N 4.20, found: C 46.61, H 6.05, N 4.06.

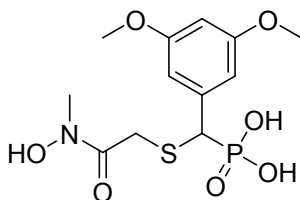

**4a**

Chemical Formula:  $C_{12}H_{18}NO_7PS$

**Figure S18. (((2-(Hydroxy(methyl)amino)-2-oxoethyl)thio)(4-**

**(methylthio)phenyl)methyl)phosphonic acid (4a).**<sup>5</sup> white solid; yield: 80%. M. p. 134 °C;  $^1H$

NMR (600.22 MHz, DMSO- $d_6$ ):  $\delta$ =10.00 (br. s, OH), 7.33 (dd,  $^3J(\text{H,H})=8.3$  Hz,  $^4J(\text{H,H})=1.6$  Hz, 2H,  $\text{H}_{\text{arom.}}$ ), 7.20 (d,  $^3J(\text{H,H})=8.3$  Hz, 2H,  $\text{H}_{\text{arom.}}$ ), 4.23 (d,  $^2J(\text{H,P})=19.2$  Hz, 1H, PCH), 3.48 (d,  $^2J(\text{H,H})=14.6$  Hz, 1H,  $\text{SCH}_2$ ), 3.21 (d,  $^2J(\text{H,H})=14.6$  Hz, 1H,  $\text{SCH}_2$ ), 3.06 (s, 3H,  $\text{NCH}_3$ ), 2.46 ppm (s, 3H,  $\text{SCH}_3$ );  $^{13}\text{C}$  NMR (150.93 MHz, DMSO- $d_6$ ):  $\delta$ =168.90 (C=O), 136.49 ( $\text{C}_{\text{arom.}}$ ), 133.93 (d,  $^2J(\text{C,P})=4.1$  Hz,  $\text{C}_{\text{arom.}}$ ), 129.79 (d,  $^3J(\text{C,P})=5.8$  Hz,  $\text{C}_{\text{arom.}}$ ), 125.49 ( $\text{C}_{\text{arom.}}$ ), 45.32 (d,  $^1J(\text{C,P})=139.5$  Hz, PC), 35.73 ( $\text{NCH}_3$ ), 31.76 (d,  $^3J(\text{C,P})=6.5$  Hz,  $\text{SCH}_2$ ), 14.65 ppm ( $\text{SCH}_3$ ); HPLC analysis: retention time=2.011 min, peak area: 98.90%, eluent A:  $\text{NH}_4\text{OAc}$  solution (5 mM), eluent B:  $\text{CH}_3\text{CN}$ , isocratic (1:1) over 30 min with a flow rate of 1 mL  $\text{min}^{-1}$  and detection at 254 nm.

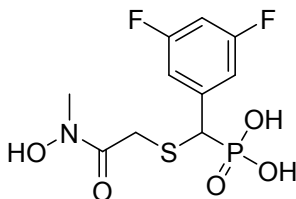

**4b**

Chemical Formula:  $\text{C}_{10}\text{H}_{12}\text{F}_2\text{NO}_5\text{PS}$

**Figure S19. ((3,5-Difluorophenyl)((2-(hydroxy(methyl)amino)-2-oxoethyl)thio)methyl phosphonic acid (4b).**<sup>5</sup> White solid; yield: 60%. M. p. 135 °C;  $^1\text{H}$  NMR (500.13 MHz, DMSO- $d_6$ ):  $\delta$ =10.01 (br. s, OH), 7.17-7.12 (m, 1H,  $\text{H}_{\text{arom.}}$ ), 7.09 (d,  $^3J(\text{H,H})=8.3$  Hz, 2H,  $\text{H}_{\text{arom.}}$ ), 4.33 (d,  $^2J(\text{H,P})=19.8$  Hz, 0.87H, PCH), 4.25 (d,  $^2J(\text{H,P})=19.8$  Hz, 0.13H, PCH), 3.48 (d,  $^2J(\text{H,H})=14.6$  Hz, 1H,  $\text{SCH}_2$ ), 3.28 (d,  $^2J(\text{H,H})=14.7$  Hz, 1H,  $\text{SCH}_2$ ), 3.09 (s, 0.31H,  $\text{NCH}_3$ ), 3.05 (s, 2.53H,  $\text{NCH}_3$ ), 3.01 ppm (s, 0.16H,  $\text{NCH}_3$ );  $^{13}\text{C}$  NMR (125.76 MHz, DMSO- $d_6$ ):  $\delta$ =168.54 (C=O), 161.78 (dd,  $^1J(\text{C,F})=246.8$  Hz,  $^3J(\text{C,F})=13.0$  Hz,  $\text{C}_{\text{arom.}}$ ), 142.47-142.26 (m,  $\text{C}_{\text{arom.}}$ ), 112.27 (dd,  $^2J(\text{C,F})=25.7$  Hz,  $^4J(\text{C,F})=^3J(\text{C,P})=5.7$  Hz,  $\text{C}_{\text{arom.}}$ ), 102.69-102.16 (m,  $\text{C}_{\text{arom.}}$ ), 45.39 (d,  $^1J(\text{C,P})=137.5$  Hz, PC), 35.69 ( $\text{NCH}_3$ ), 32.04 ppm (d,  $^3J(\text{C,P})=7.8$  Hz,  $\text{SCH}_2$ ); HPLC

analysis: retention time=1.870 min, peak area: 99.41%, eluent A: NH<sub>4</sub>OAc solution (5 mM), eluent B: CH<sub>3</sub>CN, isocratic (1:1) over 20 min with a flow rate of 1 mL min<sup>-1</sup> and detection at 254 nm.

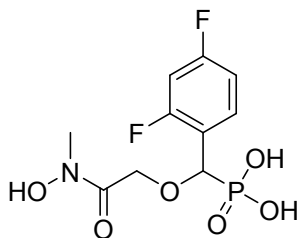

**4b**

Chemical Formula: C<sub>10</sub>H<sub>12</sub>F<sub>2</sub>NO<sub>6</sub>P

**Figure S20. ((2,4-Difluorophenyl) (2-(hydroxy(methyl)amino)-2-oxoethoxy) methyl) phosphonic acid (5).**<sup>3</sup> Colorless crystals (740mg, 47%). M. p. 155°C. <sup>1</sup>H-NMR(500 MHz, DMSO-d<sub>6</sub>) = δ (ppm) 3.06 (s, 3H, NCH<sub>3</sub>), 4.22 (d, *J*=16.1 Hz, 1H, OCH<sub>2</sub>C=O), 4.35 (d, *J*=16.0 Hz, 1H, OCH<sub>2</sub>C=O), 4.93 (d, 2*J*<sub>H,P</sub>=13.5 Hz, 1H, PCH), 7.12 (dt, 3*J*<sub>H,F</sub>=8.6 Hz, 5*J*<sub>H,P</sub>=2.2 Hz, 1H, C<sub>6</sub>H<sub>3</sub>F<sub>2</sub>: H<sub>3</sub>), 7.19 (dt, 3*J*<sub>H,H</sub>=3*J*<sub>H,F</sub>=9.8 Hz, 5*J*<sub>H,P</sub>=2.1 Hz, 1H, C<sub>6</sub>H<sub>3</sub>F<sub>2</sub>: H<sub>5</sub>), 7.54 (ddt, 3*J*<sub>H,H</sub>=4*J*<sub>H,F</sub>=8.4 Hz, 4*J*<sub>H,F'</sub>=6.8 Hz, 4*J*<sub>H,P</sub>=1.6 Hz, 1H, C<sub>6</sub>H<sub>3</sub>F<sub>2</sub>: H<sub>6</sub>), 9.82 (s, 1H, OH) <sup>13</sup>C-NMR(125 MHz, DMSO-d<sub>6</sub>) = δ (ppm) 35.58 (NCH<sub>3</sub>), 66.77 (d, 3*J*<sub>C,P</sub>=8.8 Hz, OCH<sub>2</sub>C=O), 70.93 (d, 1*J*<sub>C,P</sub>=162.9 Hz, PCH), 103.18 (t, 2*J*<sub>C,F</sub>=2*J*<sub>C,F'</sub>=26.5 Hz, C<sub>6</sub>H<sub>3</sub>F<sub>2</sub>: C<sub>3</sub>), 111.20 (d, 2*J*<sub>C,F</sub>=21.2 Hz, C<sub>6</sub>H<sub>3</sub>F<sub>2</sub>: C<sub>5</sub>) 120.23 (dd, 2*J*<sub>C,F</sub>=14.8 Hz, 2*J*<sub>C,P</sub>=2.5 Hz, C<sub>6</sub>H<sub>3</sub>F<sub>2</sub>: C<sub>1</sub>), 130.76 (m, C<sub>6</sub>H<sub>3</sub>F<sub>2</sub>: C<sub>6</sub>), 159.94 (ddd, 1*J*<sub>C,F</sub>=248.2 Hz, 3*J*<sub>C,F</sub>=12.5 Hz, 3*J*<sub>C,P</sub>=6.5 Hz, C<sub>6</sub>H<sub>3</sub>F<sub>2</sub>: C<sub>2</sub>), 161.14 (ddd, 1*J*<sub>C,F</sub>=245.3 Hz, 3*J*<sub>C,F</sub>=12.4 Hz, 5*J*<sub>C,P</sub>=2.7 Hz, C<sub>6</sub>H<sub>3</sub>F<sub>2</sub>: C<sub>4</sub>), 169.02 (C=O) Anal. calcd. for C<sub>10</sub>H<sub>12</sub>F<sub>2</sub>NO<sub>6</sub>P: C 38.60, H 3.89, N 4.50, found: C 38.83, H 3.79, N 4.40



## References

- (1) Behrendt, C. T.; Kunfermann, A.; Illarionova, V.; Matheussen, A.; Gräwert, T.; Groll, M.; Rohdich, F.; Bacher, A.; Eisenreich, W.; Fischer, M.; et al. Synthesis and Antiplasmodial Activity of Highly Active Reverse Analogues of the Antimalarial Drug Candidate Fosmidomycin. *ChemMedChem* **2010**, *5* (10), 1673–1676.
- (2) Behrendt, C. T.; Kunfermann, A.; Illarionova, V.; Matheussen, A.; Pein, M. K.; Gräwert, T.; Kaiser, J.; Bacher, A.; Eisenreich, W.; Illarionov, B.; et al. Reverse Fosmidomycin Derivatives against the Antimalarial Drug Target IspC (Dxr). *J. Med. Chem.* **2011**, *54* (19), 6796–6802.
- (3) Brücher, K.; Illarionov, B.; Held, J.; Tschan, S.; Kunfermann, A.; Pein, M. K.; Bacher, A.; Gräwert, T.; Maes, L.; Mordmüller, B.; et al.  $\alpha$ -Substituted  $\beta$ -Oxa Isosteres of Fosmidomycin: Synthesis and Biological Evaluation. *J. Med. Chem.* **2012**, *55* (14), 6566–6575.
- (4) Konzuch, S.; Umeda, T.; Held, J.; Hähn, S.; Brücher, K.; Lienau, C.; Behrendt, C. T.; Gräwert, T.; Bacher, A.; Illarionov, B.; et al. Binding Modes of Reverse Fosmidomycin Analogs toward the Antimalarial Target IspC. *J. Med. Chem.* **2014**, *57* (21), 8827–8838.
- (5) Lienau, C.; Gräwert, T.; Alves Avelar, L. A.; Illarionov, B.; Held, J.; Knaab, T. C.; Lungerich, B.; van Geelen, L.; Meier, D.; Geissler, S.; et al. Novel Reverse Thia-Analogs of Fosmidomycin: Synthesis and Antiplasmodial Activity. *Eur. J. Med. Chem.* **2019**, *181*.
- (6) Kunfermann, A.; Lienau, C.; Illarionov, B.; Held, J.; Gräwert, T.; Behrendt, C. T.; Werner, P.; Hähn, S.; Eisenreich, W.; Riederer, U.; et al. IspC as Target for Antiinfective Drug Discovery: Synthesis, Enantiomeric Separation, and Structural Biology of Fosmidomycin Thia Isosters. *J. Med. Chem.* **2013**, *56* (20), 8151–8162.
